# Supplementary material for: A divergent CheW confers plasticity to nucleoid-associated chemosensory arrays
Source: PLOS journal article supplement (doi:10.1371/journal.pgen.1008533), 2019-12-20
Supplement: S3 (10.1371/journal.pgen.1008533.s003) [file journal.pgen.1008533.s003]

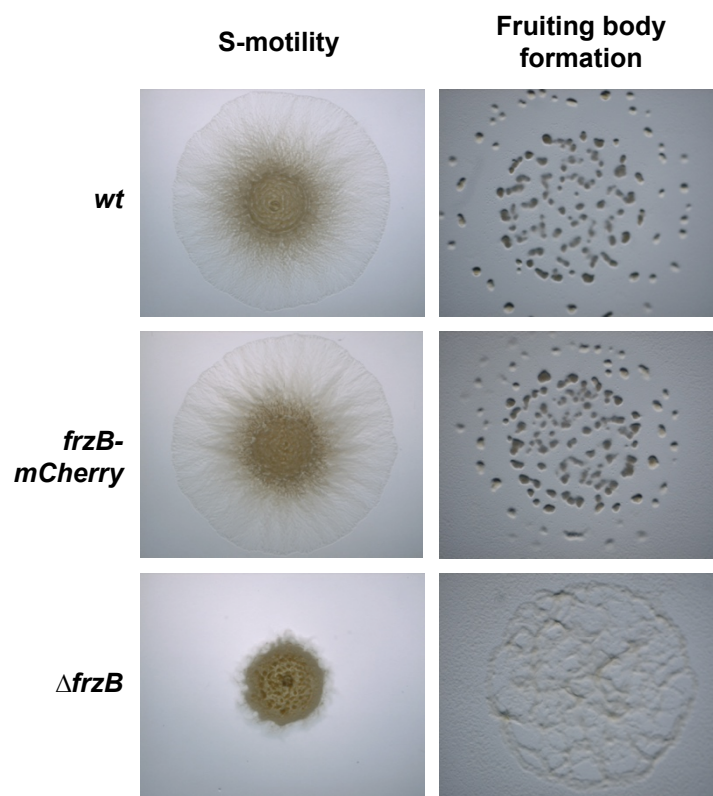

Figure S3
